# Supplementary material for: Are adolescents more socially integrated in all-day schools than in half-day schools?
Source: Atypon-hosted journal article supplement (doi:10.1024/1010-0652/a000370), 2023-09-08
Supplement: 1010-0652_a000370_esm1.pdf [file 1010-0652_a000370_esm1.pdf]

## Electronic supplementary material 1

**Table E1**

*Correlations Between Participation Rate in Extracurricular Activities, Self-reported Social Integration and Network Indicators of Social Integration*

|                                                              | (1)   | (2)   | (3)   | (4)   | (5)   | (6)  |
|--------------------------------------------------------------|-------|-------|-------|-------|-------|------|
| (1) Participation rate in extracurricular activities         |       |       |       |       |       |      |
| (2) Classroom mean of perceived classroom social relatedness | -.18* |       |       |       |       |      |
| (3) Classroom mean of general school satisfaction            | -.16* | .79*  |       |       |       |      |
| (4) Density of friendship network                            | -.04* | .36*  | .24*  |       |       |      |
| (5) Density of support network                               | -.07* | .40*  | .31*  | .51*  |       |      |
| (6) Density of break-spending network                        | -.18* | .29*  | .22*  | .61*  | .54*  |      |
| (7) Density of rejection as deskmates network                | .16*  | -.49* | -.32* | -.05* | -.04* | .05* |

Note.  $n = 10010$ . No missing data. Bonferroni adjustment for multiple testing.  $*p < .001$ .

**Table E2***Correlations Between Diversity of Extracurricular Activities, Self-reported Social Integration and Network Indicators of Social Integration*

|                                                              | (1)   | (2)   | (3)   | (4)   | (5)   | (6)  |
|--------------------------------------------------------------|-------|-------|-------|-------|-------|------|
| (1) Diversity of extracurricular activities                  |       |       |       |       |       |      |
| (2) Classroom mean of perceived classroom social relatedness | -.27* |       |       |       |       |      |
| (3) Classroom mean of general school satisfaction            | -.25* | .79*  |       |       |       |      |
| (4) Density of friendship network                            | -.06* | .36*  | .24*  |       |       |      |
| (5) Density of support network                               | -.11* | .40*  | .31*  | .51*  |       |      |
| (6) Density of break-spending network                        | -.13* | .29*  | .22*  | .61*  | .54*  |      |
| (7) Density of rejection as deskmates network                | .14*  | -.49* | -.32* | -.05* | -.04* | .05* |

*Note.*  $n = 10010$ . No missing data. Bonferroni adjustment for multiple testing. \* $p < .001$ .

**Table E3***Descriptive Statistics and Mean Differences for Indicators of Social Integration Between Half-day and All-day Schools at the Classroom Level*

|                                                 | Half-day schools |        | All-day schools |        | $M_1 - M_2$ | $d$   | $SE$ | $p$  |
|-------------------------------------------------|------------------|--------|-----------------|--------|-------------|-------|------|------|
|                                                 | $M_1$            | $SD_1$ | $M_2$           | $SD_2$ |             |       |      |      |
| Diversity of extracurricular activities         | 0.71             | 1.51   | 1.17            | 2.25   | -0.46       | -0.24 | 0.08 | .000 |
| <b>Self-reported social integration</b>         |                  |        |                 |        |             |       |      |      |
| <b>(Classroom means)</b>                        |                  |        |                 |        |             |       |      |      |
| Perceived classroom social relatedness          | 3.25             | 0.16   | 3.24            | 0.18   | 0.01        | 0.07  | 0.02 | .612 |
| General school satisfaction                     | 3.17             | 0.17   | 3.15            | 0.16   | 0.02        | 0.12  | 0.02 | .379 |
| <b>Network indicators of social integration</b> |                  |        |                 |        |             |       |      |      |
| Density of friendship network                   | 0.38             | 0.09   | 0.39            | 0.10   | -0.01       | -0.08 | 0.01 | .503 |
| Density of support network                      | 0.18             | 0.06   | 0.19            | 0.06   | -0.01       | -0.17 | 0.01 | .159 |
| Density of break-spending network               | 0.20             | 0.06   | 0.19            | 0.06   | 0.01        | 0.23  | 0.01 | .053 |
| Density of rejection as deskmates network       | 0.17             | 0.06   | 0.18            | 0.07   | -0.01       | -0.16 | 0.01 | .218 |

Note.  $M_2 - M_1$  = absolute mean difference between half-day and all-day schools,  $SE$  = standard error of the mean differences,  $d$  = Cohen's  $d$ . All descriptive statistics are located on the classroom level (253 classes in half-day schools and 228 classes in all-day schools).

**Figure E4**

*Regression Coefficients of Diversity of Extracurricular Activities Predicting Self-reported Social Integration and Network Indicators of Social Integration*

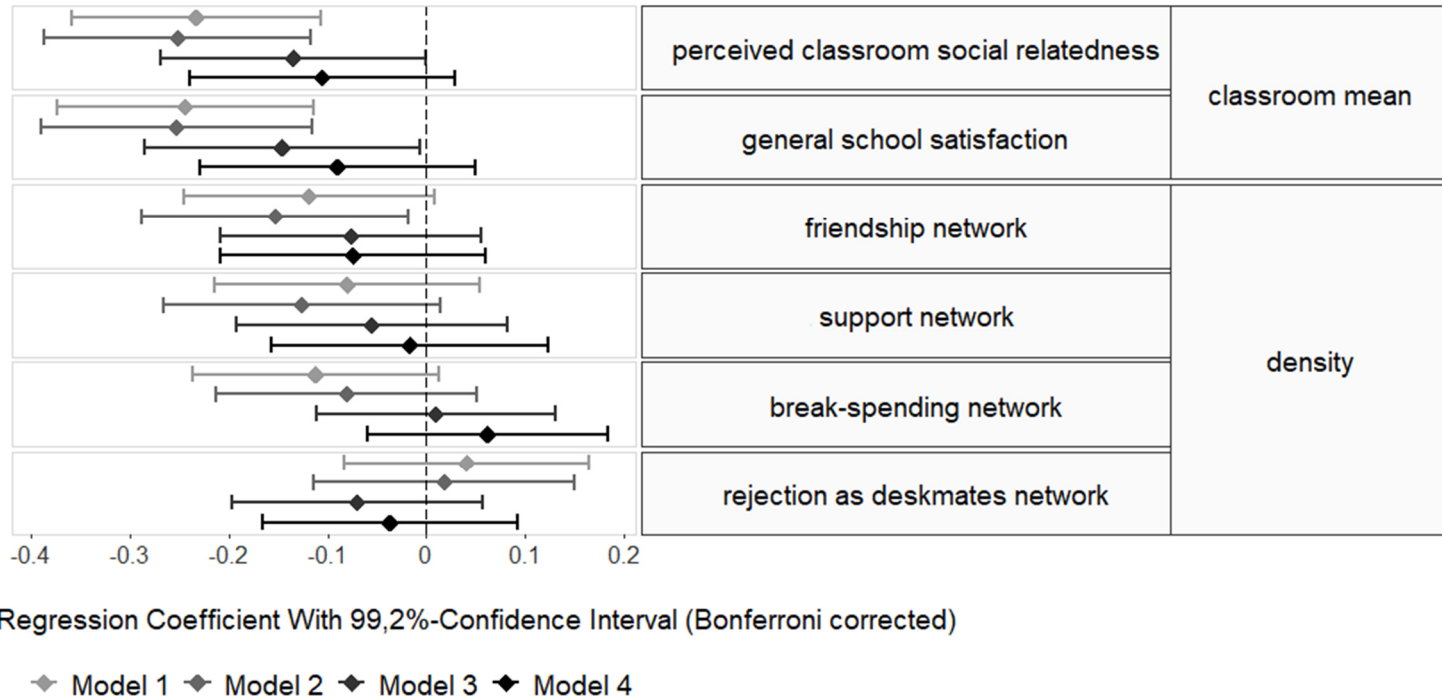

*Note.* Linear regression models predicting responses on Likert scales and network indicators of social integration at the classroom level. Reference group: diversity of extracurricular activities (z-standardized). Error bars indicate confidence intervals for the regression coefficients (Bonferroni corrected significance level  $\alpha < .008$  using the 99.2% confidence interval). When the confidence interval does not include zero,

there is a significant difference between half-day and all-day schools. All outcomes are z-standardized. Predictors for *Model 1*: diversity of extracurricular activities (z-standardized). Predictors for *Model 2*: all-day schooling and diversity of extracurricular activities. Predictors for *Model 3*: all-day schooling, diversity of extracurricular activities (z-standardized), class size (z-standardized), school track, interactions between school track and all-day schooling, federal states in Germany. Predictors for *Model 4*: all-day schooling, diversity of extracurricular activities (z-standardized), immigrant background (z-standardized class mean), spoken German at home (z-standardized class mean), social background (z-standardized class mean), cognitive abilities (z-standardized class mean), class size (z-standardized), school track, interactions between school track and all-day schooling, federal states in Germany (predictors not shown).

**Figure E5**

*Regression Coefficients of All-day Schooling Predicting Self-reported Social Integration and Network Indicators of Social Integration*

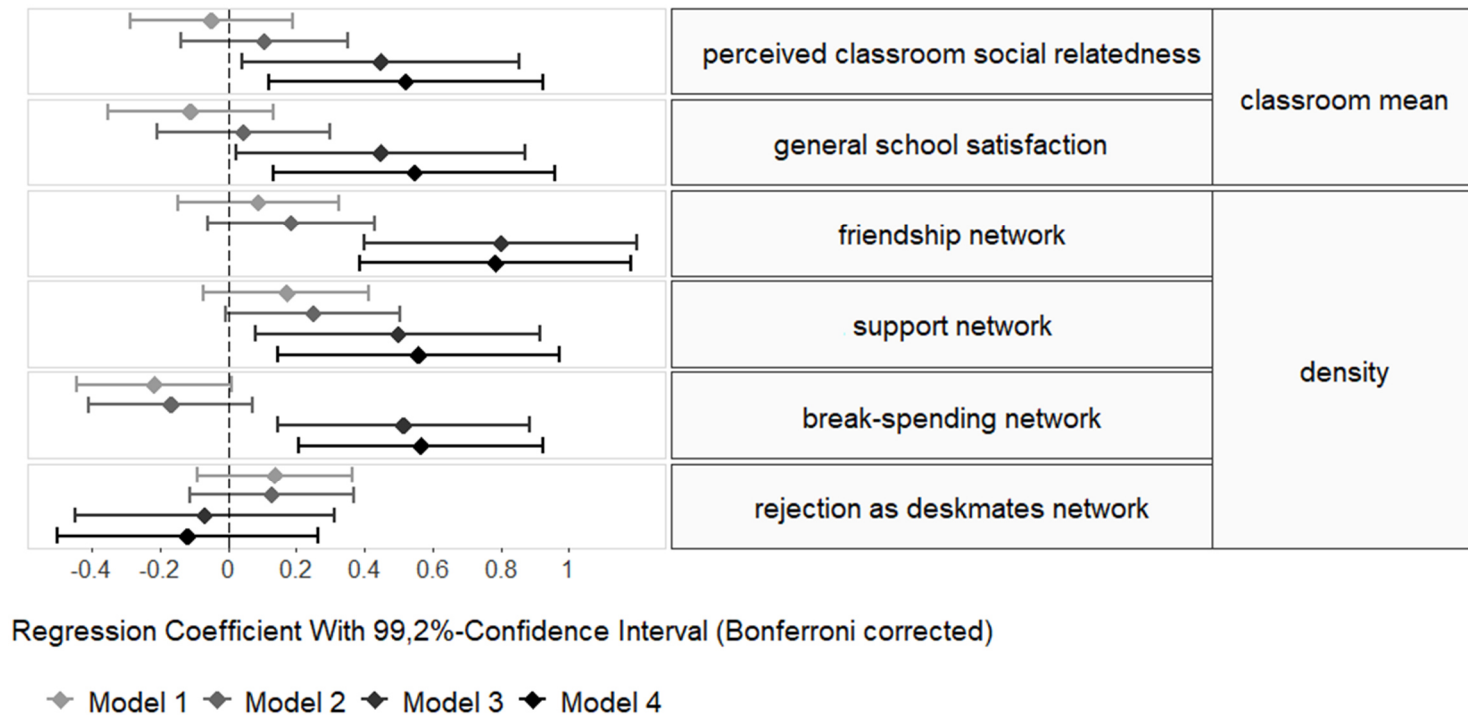

*Note.* Linear regression models predicting responses on Likert scales and network indicators of social integration at the classroom level.

Reference group: half-day schools. Error bars indicate confidence intervals for the regression coefficients (Bonferroni corrected significance level  $\alpha < .008$  using the 99.2% confidence interval). When the confidence interval does not include zero, there is a significant difference

between half-day and all-day schools. All outcomes are z-standardized. Predictors for *Model 1*: all-day schooling. Predictors for *Model 2*: all-day schooling and diversity of extracurricular activities. Predictors for *Model 3*: all-day schooling, diversity of extracurricular activities (z-standardized), class size (z-standardized), school track, interactions between school track and all-day schooling, federal states in Germany. Predictors for *Model 4*: all-day schooling, diversity of extracurricular activities (z-standardized), immigrant background (z-standardized class mean), spoken German at home (z-standardized class mean), social background (z-standardized class mean), cognitive abilities (z-standardized class mean), class size (z-standardized), school track, interactions between school track and all-day schooling, federal states in Germany (predictors not shown).
